# Supplementary material for: Activity of Cerebellar Nuclei Neurons Correlates with ZebrinII Identity of Their Purkinje Cell Afferents
Source: MDPI journal article supplement (doi:10.3390/cells10102686), 2021-10-07
Supplement: s1 [file s1]

**Table S1.** Data for *in vivo* electrophysiology in the adult mouse. Descriptive values are represented as  $\pm$  SEM. Abbreviations: Z+ = ZebrinII positive domain, Z- = ZebrinII negative domain, DF = degrees of freedom, Hz = hertz.

| Related Figure          | Test Applied            | Group              | p-Value       | Population-Value           | Descriptive Values                          | Population Size           |
|-------------------------|-------------------------|--------------------|---------------|----------------------------|---------------------------------------------|---------------------------|
| Figure 1C               | Unpaired <i>t</i> -test | Z+ vs. Z-          | <u>0.0107</u> | ( <i>t</i> ) 2.603 (DF) 95 | 53.9 $\pm$ 3.5 Hz vs. 68.7 $\pm$ 4.7 Hz     | 57 vs. 40 cells (10 mice) |
| Figure 1D <sub>1</sub>  | Mann-Whitney U test     | Z+ vs. Z-          | 0.6211        | ( <i>U</i> ) 1072          | 1.25 $\pm$ 0.27 vs. 1.02 $\pm$ 0.29         | 57 vs. 40 cells (10 mice) |
| Figure 1D <sub>2</sub>  | Mann-Whitney U test     | Z+ vs. Z-          | 0.9957        | ( <i>U</i> ) 1139          | 0.48 $\pm$ 0.02 vs. 0.48 $\pm$ 0.03         | 57 vs. 40 cells (10 mice) |
| Figure 1E               | Mann-Whitney U test     | Z+ vs. Z-          | 0.7041        | ( <i>U</i> ) 1095          | 0.0027 $\pm$ 0.0018 vs. 0.0008 $\pm$ 0.0003 | 57 vs. 40 cells (10 mice) |
| Figure 1F               | Mann-Whitney U test     | Z+ vs. Z-          | 0.9201        | ( <i>U</i> ) 1126          | 11.3 $\pm$ 3.7 vs. 7.5 $\pm$ 2.7            | 57 vs. 40 cells (10 mice) |
| Figure 1G               | Mann-Whitney U test     | Z+ vs. Z-          | 0.8568        | ( <i>U</i> ) 1115          | 984.2 $\pm$ 628.6 vs. 379.6 $\pm$ 288.7     | 57 vs. 40 cells (10 mice) |
| Supplementary Figure 2A | Mann-Whitney U test     | Z+ vs. Z-          | 0.1954        | ( <i>U</i> ) 1066          | 0.0003 $\pm$ 0.0003 vs. 0.0001 $\pm$ 0.0001 | 57 vs. 40 cells (10 mice) |
| Supplementary Figure 2B | Kruskal-Wallis test     | P12-P14: Z+ vs. Z- | 0.6097        | ( <i>Z</i> ) 0.511         | 0.0103 $\pm$ 0.0040 vs. 0.0073 $\pm$ 0.0059 | 25 vs. 10 cells (7 mice)  |
|                         |                         | P15-P17: Z+ vs. Z- | 0.3305        | ( <i>Z</i> ) 0.973         | 0.0026 $\pm$ 0.0007 vs. 0.0033 $\pm$ 0.0020 | 55 vs. 22 cells (13 mice) |
|                         |                         | P18-P20: Z+ vs. Z- | 0.9240        | ( <i>Z</i> ) 0.096         | 0.0008 $\pm$ 0.0004 vs. 0.0004 $\pm$ 0.0002 | 34 vs. 17 cells (9 mice)  |
|                         |                         | P21-P24: Z+ vs. Z- | 0.5962        | ( <i>Z</i> ) 0.530         | 0.0008 $\pm$ 0.0003 vs. 0.0003 $\pm$ 0.0001 | 70 vs. 25 cells (17 mice) |
|                         |                         | P30-P40: Z+ vs. Z- | 0.8104        | ( <i>Z</i> ) 0.240         | 0.0001 $\pm$ 0.0001 vs. 0.0001 $\pm$ 0.0001 | 17 vs. 32 cells (6 mice)  |

**Table S2.** Data for *in vivo* electrophysiology in mice from postnatal day 12 to 40. Descriptive values are represented as mean  $\pm$  SEM. Abbreviations: Z+ = ZebrinII positive domain, Z- = ZebrinII negative domain, DF = degrees of freedom, Hz = hertz.

| Related Figure         | Test Applied                        | Group              | p-Value       | Population-Value     | Descriptive Values                          | Population Size           |
|------------------------|-------------------------------------|--------------------|---------------|----------------------|---------------------------------------------|---------------------------|
| Figure 2B              | Kruskal–Wallis test                 | P12–P14: Z+ vs. Z– | 0.1287        | (Z) 1.519            | 7.90 $\pm$ 1.66 Hz vs. 19.37 $\pm$ 5.15 Hz  | 25 vs. 10 cells (7 mice)  |
|                        |                                     | P15–P17: Z+ vs. Z– | 0.2028        | (Z) 1.274            | 17.57 $\pm$ 2.42 Hz vs. 23.38 $\pm$ 3.41 Hz | 55 vs. 22 cells (13 mice) |
|                        |                                     | P18–P20: Z+ vs. Z– | 0.1368        | (Z) 1.488            | 27.61 $\pm$ 3.80 Hz vs. 41.08 $\pm$ 6.70 Hz | 34 vs. 17 cells (9 mice)  |
|                        |                                     | P21–P24: Z+ vs. Z– | 0.5107        | (Z) 0.658            | 52.78 $\pm$ 3.25 Hz vs. 52.97 $\pm$ 8.03 Hz | 70 vs. 25 cells (17 mice) |
|                        |                                     | P30–P40: Z+ vs. Z– | 0.5542        | (Z) 0.592            | 67.11 $\pm$ 5.74 Hz vs. 61.61 $\pm$ 4.92 Hz | 17 vs. 32 cells (6 mice)  |
| Figure 2C <sub>1</sub> | Kruskal–Wallis test                 | P12–P14: Z+ vs. Z– | 0.6442        | (Z) 0.462            | 1.83 $\pm$ 0.21 vs. 1.47 $\pm$ 0.21         | 25 vs. 10 cells (7 mice)  |
|                        |                                     | P15–P17: Z+ vs. Z– | <u>0.0082</u> | (Z) 2.645            | 1.77 $\pm$ 0.21 vs. 1.00 $\pm$ 0.13         | 55 vs. 22 cells (13 mice) |
|                        |                                     | P18–P20: Z+ vs. Z– | 0.7312        | (Z) 0.344            | 1.54 $\pm$ 0.40 vs. 2.08 $\pm$ 0.66         | 34 vs. 17 cells (9 mice)  |
|                        |                                     | P21–P24: Z+ vs. Z– | 0.6427        | (Z) 0.464            | 1.19 $\pm$ 0.21 vs. 0.99 $\pm$ 0.19         | 70 vs. 25 cells (17 mice) |
|                        |                                     | P30–P40: Z+ vs. Z– | 0.9670        | (Z) 0.041            | 0.65 $\pm$ 0.06 vs. 0.74 $\pm$ 0.12         | 17 vs. 32 cells (6 mice)  |
| Figure 2C <sub>2</sub> | Brown–Forsythe and Welch ANOVA test | P12–P14: Z+ vs. Z– | 0.4785        | (t) 0.724 (DF) 17.92 | 0.87 $\pm$ 0.06 vs. 0.79 $\pm$ 0.09         | 25 vs. 10 cells (7 mice)  |
|                        |                                     | P15–P17: Z+ vs. Z– | <u>0.0267</u> | (t) 2.302 (DF) 39.50 | 0.69 $\pm$ 0.03 vs. 0.55 $\pm$ 0.05         | 55 vs. 22 cells (13 mice) |
|                        |                                     | P18–P20: Z+ vs. Z– | 0.5302        | (t) 0.634 (DF) 33.06 | 0.55 $\pm$ 0.04 vs. 0.50 $\pm$ 0.05         | 34 vs. 17 cells (9 mice)  |
|                        |                                     | P21–P24: Z+ vs. Z– | 0.2503        | (t) 1.162 (DF) 52.40 | 0.48 $\pm$ 0.02 vs. 0.44 $\pm$ 0.03         | 70 vs. 25 cells (17 mice) |
|                        |                                     | P30–P40: Z+ vs. Z– | 0.8360        | (t) 0.208 (DF) 40.50 | 0.49 $\pm$ 0.04 vs. 0.48 $\pm$ 0.04         | 17 vs. 32 cells (6 mice)  |
| Figure 2D              | Kruskal–Wallis test                 | P12–P14: Z+ vs. Z– | 0.2278        | (Z) 1.206            | 0.0141 $\pm$ 0.0043 vs. 0.0073 $\pm$ 0.0059 | 25 vs. 10 cells (7 mice)  |
|                        |                                     | P15–P17: Z+ vs. Z– | 0.8160        | (Z) 0.233            | 0.0043 $\pm$ 0.0001 vs. 0.0033 $\pm$ 0.0020 | 55 vs. 22 cells (13 mice) |
|                        |                                     | P18–P20: Z+ vs. Z– | 0.2269        | (Z) 1.208            | 0.0017 $\pm$ 0.0006 vs. 0.0004 $\pm$ 0.0002 | 34 vs. 17 cells (9 mice)  |
|                        |                                     | P21–P24: Z+ vs. Z– | <u>0.0052</u> | (Z) 2.792            | 0.0026 $\pm$ 0.0006 vs. 0.0003 $\pm$ 0.0001 | 70 vs. 25 cells (17 mice) |
|                        |                                     | P30–P40: Z+ vs. Z– | <u>0.0054</u> | (Z) 2.782            | 0.0032 $\pm$ 0.0013 vs. 0.0001 $\pm$ 0.0001 | 17 vs. 32 cells (6 mice)  |
| Firing frequency       | Unpaired <i>t</i> -test             | Z–: P90 vs. P30–40 | 0.3019        | (t) 1.040 (DF) 70    | 68.70 $\pm$ 4.66 Hz vs. 61.61 $\pm$ 4.92 Hz | 40 vs. 32 cells (16 mice) |
|                        |                                     | Z+: P90 vs. P30–40 | 0.0663        | (t) 1.865 (DF) 72    | 53.89 $\pm$ 3.47 Hz vs. 67.11 $\pm$ 5.74 Hz | 57 vs. 17 cells (16 mice) |
| CV                     | Mann–Whitney U test                 | Z–: P90 vs. P30–40 | 0.4953        | (U) 579              | 1.023 $\pm$ 0.29 vs. 0.74 $\pm$ 0.12        | 40 vs. 32 cells (16 mice) |
|                        |                                     | Z+: P90 vs. P30–40 | 0.6267        | (U) 446              | 1.25 $\pm$ vs. 0.65 $\pm$ 0.06              | 57 vs. 17 cells (16 mice) |
| CV2                    | Unpaired <i>t</i> -test             | Z–: P90 vs. P30–40 | 0.8456        | (t) 0.195 (DF) 70    | 0.48 $\pm$ 0.03 vs. 0.48 $\pm$ 0.04         | 40 vs. 32 cells (16 mice) |
|                        |                                     | Z+: P90 vs. P30–40 | 0.7972        | (U) 464              | 0.48 $\pm$ 0.02 vs. 0.49 $\pm$ 0.04         | 57 vs. 17 cells (16 mice) |
| Burst index 50ms       | Mann–Whitney U test                 | Z–: P90 vs. P30–40 | <u>0.0145</u> | (U) 3                | 0.0008 $\pm$ 0.0003 vs. 0.0001 $\pm$ 0.0001 | 40 vs. 32 cells (16 mice) |
|                        |                                     | Z+: P90 vs. P30–40 | 0.0790        | (U) 365              | 0.0027 $\pm$ 0.0017 vs. 0.0032 $\pm$ 0.0013 | 57 vs. 17 cells (16 mice) |

**Table S3.** Data for *in vitro* electrophysiology in adult mice. Descriptive values are represented as mean  $\pm$  SEM. Abbreviations:  $V_m$  = membrane potential, pA = picoampere, Z+ = ZebrinII positive, Z- = ZebrinII negative, DF = degrees of freedom, Hz = hertz, ISI = interspike interval.

| Related Figure         | Test Applied            | Group                              | p-Value           | Population-Value            | Descriptive Values                          | Population Size           |
|------------------------|-------------------------|------------------------------------|-------------------|-----------------------------|---------------------------------------------|---------------------------|
| Figure 3B              | Unpaired <i>t</i> -test | Z+ vs. Z-                          | 0.4633            | ( <i>t</i> ) 0.742 (DF) 32  | $-48.2 \pm 1.0 V_m$ vs. $-47.2 \pm 0.7 V_m$ | 20 vs. 14 cells (22 mice) |
| Figure 3C              | Mann-Whitney U test     | Z+ vs. Z-                          | 0.4363            | ( <i>U</i> ) 117            | 70.8 $\pm$ 9.1 Hz vs. 83.9 $\pm$ 10.0 Hz    | 20 vs. 14 cells (22 mice) |
| Figure 3D <sub>1</sub> | Mann-Whitney U test     | Z+ vs. Z-                          | 0.7692            | ( <i>U</i> ) 131            | 0.17 $\pm$ 0.04 vs. 0.13 $\pm$ 0.02         | 20 vs. 14 cells (22 mice) |
| Figure 3D <sub>2</sub> | Mann-Whitney U test     | Z+ vs. Z-                          | 0.8698            | ( <i>U</i> ) 135            | 0.05 $\pm$ 0.01 vs. 0.5 $\pm$ 0.01          | 20 vs. 14 cells (22 mice) |
| Figure 3F              | Two-way ANOVA           | Effect of ZebrinII                 | 0.2687            | F (1, 16) = 1.313           |                                             |                           |
|                        |                         | Effect of current input            | <b>&lt;0.0001</b> | F (11, 176) = 398.2         |                                             |                           |
|                        |                         | Effect of ZebrinII * current input | 0.6119            | F (11, 176) = 0.828         |                                             |                           |
|                        |                         | -100 pA: Z+ vs. Z-                 | >0.9999           | ( <i>t</i> ) 0.000 (DF) 192 | 0.00 Hz vs. 0.00 Hz                         |                           |
|                        |                         | -50 pA: Z+ vs. Z-                  | >0.9999           | ( <i>t</i> ) 0.000 (DF) 192 | 0.00 Hz vs. 0.00 Hz                         |                           |
|                        |                         | 0 pA: Z+ vs. Z-                    | 0.6980            | ( <i>t</i> ) 0.389 (DF) 192 | 0.53 $\pm$ 0.48 Hz vs. 6.25 $\pm$ 5.51 Hz   |                           |
|                        |                         | 50 pA: Z+ vs. Z-                   | 0.3735            | ( <i>t</i> ) 0.892 (DF) 192 | 34.7 $\pm$ 8.2 Hz vs. 47.9 $\pm$ 5.0 Hz     |                           |
|                        |                         | 100 pA: Z+ vs. Z-                  | 0.5248            | ( <i>t</i> ) 0.637 (DF) 192 | 69.9 $\pm$ 11.6 Hz vs. 79.3 $\pm$ 7.3 Hz    |                           |
|                        |                         | 150 pA: Z+ vs. Z-                  | 0.2470            | ( <i>t</i> ) 1.161 (DF) 192 | 93.3 $\pm$ 10.2 Hz vs. 110.4 $\pm$ 9.4 Hz   |                           |
|                        |                         | 200 pA: Z+ vs. Z-                  | 0.2811            | ( <i>t</i> ) 1.081 (DF) 192 | 122.2 $\pm$ 12.9 Hz vs. 138.1 $\pm$ 0.6 Hz  |                           |
|                        |                         | 250 pA: Z+ vs. Z-                  | 0.2108            | ( <i>t</i> ) 1.256 (DF) 192 | 144.2 $\pm$ 12.5 Hz vs. 162.6 $\pm$ 11.4 Hz |                           |
|                        |                         | 300 pA: Z+ vs. Z-                  | 0.1948            | ( <i>t</i> ) 1.301 (DF) 192 | 169.5 $\pm$ 14.3 Hz vs. 188.6 $\pm$ 12.2 Hz |                           |
|                        |                         | 350 pA: Z+ vs. Z-                  | 0.1707            | ( <i>t</i> ) 1.375 (DF) 192 | 192.0 $\pm$ 15.4 Hz vs. 212.2 $\pm$ 12.4 Hz |                           |
|                        |                         | 400 pA: Z+ vs. Z-                  | 0.1338            | ( <i>t</i> ) 1.506 (DF) 192 | 213.1 $\pm$ 16.0 Hz vs. 235.3 $\pm$ 11.6 Hz |                           |
|                        |                         | 450 pA: Z+ vs. Z-                  | 0.1166            | ( <i>t</i> ) 1.576 (DF) 192 | 231.7 $\pm$ 15.9 Hz vs. 254.9 $\pm$ 12.0 Hz | 9 vs. 9 cells (15 mice)   |
| Figure 3G              | Mixed-effects analysis  | Effect of ZebrinII                 | <b>0.7614</b>     | F (19, 285) = 5.912         |                                             |                           |
|                        |                         | Effect of ISI                      | <b>&lt;0.0001</b> | F (1, 15) = 0.956           |                                             |                           |
|                        |                         | Effect of ZebrinII * ISI           | >0.9999           | F (19, 285) = 0.199         |                                             |                           |
|                        |                         | ISI 1                              | >0.9999           | ( <i>t</i> ) 0.000 (DF) 300 | 1.000 vs. 1.000                             |                           |
|                        |                         | ISI 2                              | 0.6722            | ( <i>t</i> ) 0.424 (DF) 300 | 0.794 $\pm$ 0.024 vs. 0.850 $\pm$ 0.065     |                           |
|                        |                         | ISI 3                              | 0.5772            | ( <i>t</i> ) 0.558 (DF) 300 | 0.766 $\pm$ 0.039 vs. 0.839 $\pm$ 0.084     |                           |
|                        |                         | ISI 4                              | 0.8290            | ( <i>t</i> ) 0.216 (DF) 300 | 0.765 $\pm$ 0.041 vs. 0.793 $\pm$ 0.099     |                           |
|                        |                         | ISI 5                              | 0.8472            | ( <i>t</i> ) 0.193 (DF) 300 | 0.752 $\pm$ 0.052 vs. 0.777 $\pm$ 0.089     |                           |
|                        |                         | ISI 6                              | 0.6575            | ( <i>t</i> ) 0.444 (DF) 300 | 0.740 $\pm$ 0.048 vs. 0.798 $\pm$ 0.099     |                           |
|                        |                         | ISI 7                              | 0.6786            | ( <i>t</i> ) 0.415 (DF) 300 | 0.744 $\pm$ 0.054 vs. 0.798 $\pm$ 0.123     |                           |
|                        |                         | ISI 8                              | 0.6331            | ( <i>t</i> ) 0.478 (DF) 300 | 0.741 $\pm$ 0.053 vs. 0.804 $\pm$ 0.118     |                           |
|                        |                         | ISI 9                              | 0.8170            | ( <i>t</i> ) 0.232 (DF) 300 | 0.734 $\pm$ 0.057 vs. 0.765 $\pm$ 0.089     |                           |
|                        |                         | ISI 10                             | 0.7172            | ( <i>t</i> ) 0.363 (DF) 300 | 0.725 $\pm$ 0.063 vs. 0.772 $\pm$ 0.112     |                           |
|                        |                         | ISI 11                             | 0.7325            | ( <i>t</i> ) 0.342 (DF) 300 | 0.733 $\pm$ 0.053 vs. 0.778 $\pm$ 0.120     |                           |
|                        |                         | ISI 12                             | 0.8080            | ( <i>t</i> ) 0.243 (DF) 300 | 0.754 $\pm$ 0.056 vs. 0.786 $\pm$ 0.114     |                           |
|                        |                         | ISI 13                             | 0.7920            | ( <i>t</i> ) 0.264 (DF) 300 | 0.769 $\pm$ 0.070 vs. 0.804 $\pm$ 0.112     |                           |
|                        |                         | ISI 14                             | 0.9006            | ( <i>t</i> ) 0.125 (DF) 300 | 0.778 $\pm$ 0.063 vs. 0.795 $\pm$ 0.124     |                           |
|                        |                         | ISI 15                             | 0.7658            | ( <i>t</i> ) 0.298 (DF) 300 | 0.745 $\pm$ 0.057 vs. 0.784 $\pm$ 0.115     |                           |
|                        |                         | ISI 16                             | 0.8018            | ( <i>t</i> ) 0.251 (DF) 300 | 0.769 $\pm$ 0.070 vs. 0.802 $\pm$ 0.136     |                           |
|                        |                         | ISI 17                             | 0.6176            | ( <i>t</i> ) 0.500 (DF) 300 | 0.750 $\pm$ 0.059 vs. 0.815 $\pm$ 0.147     |                           |
|                        |                         | ISI 18                             | 0.8231            | ( <i>t</i> ) 0.224 (DF) 300 | 0.781 $\pm$ 0.067 vs. 0.810 $\pm$ 0.151     |                           |
|                        |                         | ISI 19                             | 0.9560            | ( <i>t</i> ) 0.055 (DF) 300 | 0.790 $\pm$ 0.068 vs. 0.797 $\pm$ 0.121     |                           |
|                        |                         | ISI 20                             | 0.8189            | ( <i>t</i> ) 0.229 (DF) 300 | 0.780 $\pm$ 0.067 vs. 0.810 $\pm$ 0.145     | 8 vs. 9 cells (14 mice)   |

**Table S4.** Data for action potential properties in adult mice, acquired with *in vitro* electrophysiology. Descriptive values are represented as mean  $\pm$  SEM. Abbreviations:  $V_m$  = membrane potential, mV = millivolt, ms = millisecond, pA = picoampere, Z+ = ZebrinII positive domain, Z- = ZebrinII negative domain, DF = degrees of freedom, Hz = hertz.

| Related figure               | Test applied            | Group     | <i>p</i> -value | Population-Value  | Descriptive values                            | Population size         |
|------------------------------|-------------------------|-----------|-----------------|-------------------|-----------------------------------------------|-------------------------|
| Action potential threshold   | Unpaired <i>t</i> -test | Z+ vs. Z- | 0.6628          | (t) 2.603 (DF) 15 | $-40.09 \pm 2.65$ mV vs. $-41.58 \pm 2.11$ mV | 8 vs. 9 cells (13 mice) |
| Peak maximum                 | Unpaired <i>t</i> -test | Z+ vs. Z- | 0.7640          | (t) 0.306 (DF) 15 | $10.48 \pm 5.281$ mV vs. $8.12 \pm 5.55$ mV   | 8 vs. 9 cells (13 mice) |
| Peak amplitude               | Unpaired <i>t</i> -test | Z+ vs. Z- | 0.8666          | (t) 0.171 (DF) 15 | $62.02 \pm 4.42$ mV vs. $60.75 \pm 5.77$ mV   | 8 vs. 9 cells (13 mice) |
| Half-width                   | Unpaired <i>t</i> -test | Z+ vs. Z- | 0.5258          | (t) 0.650 (DF) 15 | $0.29 \pm 0.02$ ms vs. $0.27 \pm 0.02$ ms     | 8 vs. 9 cells (13 mice) |
| Rise time                    | Unpaired <i>t</i> -test | Z+ vs. Z- | 0.9938          | (t) 0.008 (DF) 15 | $0.24 \pm 0.02$ ms vs. $0.24 \pm 0.03$ ms     | 8 vs. 9 cells (13 mice) |
| Decay time                   | Unpaired <i>t</i> -test | Z+ vs. Z- | 0.9914          | (t) 0.011 (DF) 15 | $0.22 \pm 0.02$ ms vs. $0.24 \pm 0.02$ ms     | 8 vs. 9 cells (13 mice) |
| Fast after-hyperpolarization | Unpaired <i>t</i> -test | Z+ vs. Z- | 0.2936          | (t) 2.057 (DF) 15 | $10.31 \pm 1.07$ mV vs. $8.06 \pm 1.70$ mV    | 8 vs. 9 cells (13 mice) |
| Rheobase                     | Unpaired <i>t</i> -test | Z+ vs. Z- | 0.9009          | (t) 0.127 (DF) 15 | $37.50 \pm 8.18$ pA vs. $38.89 \pm 7.35$ pA   | 8 vs. 9 cells (13 mice) |

**Table S5.** Data for CN neuron morphology in adult mice. Descriptive values are represented as mean  $\pm$  SEM. Abbreviations:  $\mu\text{m}$  = micrometer,  $\mu\text{m}^2$  = square micrometer, Z+ = ZebrinII positive, Z- = ZebrinII negative, DF = degrees of freedom.

| Related Figure         | Test Applied            | Group                         | p-Value                     | Population-Value            | Descriptive Values                                                 | Population Size           |
|------------------------|-------------------------|-------------------------------|-----------------------------|-----------------------------|--------------------------------------------------------------------|---------------------------|
| Figure 4B <sub>1</sub> | Welch's <i>t</i> -test  | Z+ vs. Z-                     | 0.3121                      | ( <i>t</i> ) 1.034 (DF) 22. | 306.4 ± 16.69 μm <sup>2</sup> vs.<br>342.1 ± 30.16 μm <sup>2</sup> | 17 vs. 15 cells (19 mice) |
| Figure 4B <sub>2</sub> | Mixed-effects analysis  | Effect of distance from soma  | <u>&lt;0.0001</u>           | F (13, 272) = 21.83         |                                                                    | 16 vs. 9 cells (16 mice)  |
|                        |                         | Effect of ZebrinII            | 0.3675                      | F (1, 23) = 0.845           |                                                                    |                           |
|                        |                         | Effect of distance * ZebrinII | 0.7919                      | F (13, 272) = 0.670         |                                                                    |                           |
|                        |                         | 15 μm: Z+ vs. Z-              | 0.8081                      | ( <i>t</i> ) 0.243 (DF) 295 | 4.56 ± 0.46 vs. 4.78 ± 0.15                                        |                           |
|                        |                         | 25 μm: Z+ vs. Z-              | 0.4381                      | ( <i>t</i> ) 0.776 (DF) 295 | 5.31 ± 0.50 vs. 6.00 ± 0.50                                        |                           |
|                        |                         | 35 μm: Z+ vs. Z-              | 0.6780                      | ( <i>t</i> ) 0.416 (DF) 295 | 5.19 ± 0.53 vs. 5.56 ± 0.67                                        |                           |
|                        |                         | 45 μm: Z+ vs. Z-              | 0.3242                      | ( <i>t</i> ) 0.988 (DF) 295 | 4.73 ± 0.66 vs. 5.56 ± 0.75                                        |                           |
|                        |                         | 55 μm: Z+ vs. Z-              | 0.4906                      | ( <i>t</i> ) 0.690 (DF) 295 | 4.50 ± 0.76 vs. 5.11 ± 0.99                                        |                           |
|                        |                         | 65 μm: Z+ vs. Z-              | 0.5611                      | ( <i>t</i> ) 0.582 (DF) 295 | 4.06 ± 0.67 vs. 3.75 ± 0.65                                        |                           |
|                        |                         | 75 μm: Z+ vs. Z-              | 0.6836                      | ( <i>t</i> ) 0.408 (DF) 295 | 4.50 ± 0.75 vs. 4.78 ± 1.32                                        |                           |
|                        |                         | 85 μm: Z+ vs. Z-              | 0.9592                      | ( <i>t</i> ) 0.051 (DF) 295 | 3.62 ± 0.62 vs. 3.44 ± 0.50                                        |                           |
|                        |                         | 95 μm: Z+ vs. Z-              | 0.6346                      | ( <i>t</i> ) 0.476 (DF) 295 | 2.71 ± 0.49 vs. 3.13 ± 1.08                                        |                           |
|                        |                         | 105 μm: Z+ vs. Z-             | 0.6039                      | ( <i>t</i> ) 0.519 (DF) 295 | 2.25 ± 0.49 vs. 2.38 ± 1.08                                        |                           |
|                        |                         | 115 μm: Z+ vs. Z-             | 0.2434                      | ( <i>t</i> ) 1.169 (DF) 295 | 1.46 ± 0.33 vs. 2.43 ± 0.72                                        |                           |
|                        |                         | 125 μm: Z+ vs. Z-             | 0.9940                      | ( <i>t</i> ) 0.007 (DF) 295 | 1.67 ± 0.57 vs. 1.63 ± 0.57                                        |                           |
| 135 μm: Z+ vs. Z-      | <u>0.0288</u>           | ( <i>t</i> ) 2.196 (DF) 295   | 0.60 ± 0.21 vs. 2.63 ± 0.91 |                             |                                                                    |                           |
| 145 μm: Z+ vs. Z-      | 0.3316                  | ( <i>t</i> ) 0.973 (DF) 295   | 0.25 ± 0.11 vs. 1.11 ± 0.42 |                             |                                                                    |                           |
| Soma size perimeter    | Unpaired <i>t</i> -test | Z+ vs. Z-                     | 0.6010                      | ( <i>t</i> ) 0.529 (DF) 30  | 70.26 ± 2.14 μm vs. 72.49 ± 3.79 μm                                | 17 vs. 15 cells (19 mice) |
